# Supplementary material for: Study of novel pyrazolo[3,4-d]pyrimidine derivatives as selective TgCDPK1 inhibitors: molecular docking, structure-based 3D-QSAR and molecular dynamics simulation
Source: Royal Society of Chemistry journal article supplement (doi:10.1039/c6ra20277b), 2016-01-01
Supplement: c6ra20277b1.pdf [file c6ra20277b1.pdf]

Electronic Supplementary Material (ESI) for RSC advances.

**Study of novel pyrazolo[3,4-d]pyrimidine derivatives as selective  
TgCDPK1 inhibitors: molecular docking, structure-based 3D-QSAR  
and molecular dynamics simulation**

Shaojie Ma,<sup>ab</sup> Shengfu Zhou,<sup>a</sup> Weicong Lin,<sup>a</sup> Rong Zhang,<sup>a</sup> Wenjuan Wu,<sup>a\*</sup> and Kangcheng Zheng<sup>c</sup>

<sup>a</sup>: Department of Physical Chemistry, College of Pharmacy, Guangdong Pharmaceutical University, Guangzhou 510006, China. E-mail: wuwenjuan83@126.com; Tel: +86 2039352119

<sup>b</sup>: Department of Pharmacy, Kangda College of Nanjing Medical University, Lianyungang 222000, China

<sup>c</sup>: School of Chemistry and Chemical Engineering, Sun Yat-Sen University, Guangzhou 510275, China

## **Electronic Supplementary Information**

### **Table of Contents**

|                                      |        |
|--------------------------------------|--------|
| Supplementary tables (Table S1-S2)   | S2-S7  |
| Supplementary figure (Figures S1-S3) | S8-S10 |

**Table S1** Structures and experimental values IC<sub>50</sub> (μM) of pyrazolo[3,4-d]pyrimidine derivatives

| NO. | R <sub>1</sub> | R <sub>2</sub>                                                                      | TgCDPK1                            |                   | Src              |                   | Distance<br>(APD=2.455) |       |
|-----|----------------|-------------------------------------------------------------------------------------|------------------------------------|-------------------|------------------|-------------------|-------------------------|-------|
|     |                |                                                                                     | IC <sub>50</sub>                   | pIC <sub>50</sub> | IC <sub>50</sub> | pIC <sub>50</sub> |                         |       |
| 1   | 2b             | 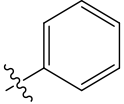   | -C(CH <sub>3</sub> ) <sub>3</sub>  | 0.0045            | 8.3468           | 0.13              | 6.8861                  | -     |
| 2*  | 3a             |    | -CH(CH <sub>3</sub> ) <sub>2</sub> | 0.019             | 7.7212           | 1.3               | 5.8861                  | 1.404 |
| 3*  | 3b             | 3                                                                                   | b                                  | 0.0073            | 8.1367           | 0.58              | 6.2366                  | 1.813 |
| 4   | 4a             |    | a                                  | 0.04              | 7.3979           | 5.1               | 5.2924                  | -     |
| 5   | 5a             |   | a                                  | 0.005             | 8.3010           | 0.65              | 6.1871                  | -     |
| 6   | 5b             | 5                                                                                   | b                                  | 0.0041            | 8.3872           | 0.18              | 6.7447                  | -     |
| 7   | 6a             |  | a                                  | 0.012             | 7.9208           | 1.5               | 5.8239                  | -     |

|            |     |                                                                                     |   |        |        |       |        |       |
|------------|-----|-------------------------------------------------------------------------------------|---|--------|--------|-------|--------|-------|
| <b>8</b>   | 7a  | 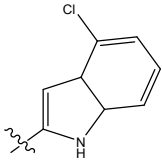   | a | 0.0091 | 8.0410 | 1.2   | 5.9208 | -     |
| <b>9</b>   | 8a  |    | a | 0.0036 | 8.4437 | 0.29  | 6.5376 | -     |
| <b>10*</b> | 8b  | 8                                                                                   | b | 0.013  | 7.8861 | 0.52  | 6.2840 | 1.855 |
| <b>11</b>  | 9b  |    | b | 0.0025 | 8.6021 | 2.1   | 5.6778 | -     |
| <b>12*</b> | 10a |    | a | 0.13   | 6.8861 | 8.8   | 5.0555 | 1.798 |
| <b>13</b>  | 10b | 10                                                                                  | b | 0.031  | 7.5086 | 2.2   | 5.6576 | -     |
| <b>14*</b> | 11a |  | a | 0.005  | 8.3010 | 0.065 | 7.1871 | 1.578 |
| <b>15</b>  | 11b | 11                                                                                  | b | 0.0079 | 8.1024 | 0.12  | 6.9208 | -     |
| <b>16</b>  | 12a |  | a | 0.024  | 7.6198 | 0.2   | 6.6990 | -     |

|     |     |                                                                                     |   |        |        |      |        |       |
|-----|-----|-------------------------------------------------------------------------------------|---|--------|--------|------|--------|-------|
| 17* | 13b | 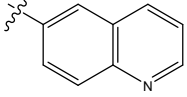   | b | 0.0031 | 8.5086 | 4.1  | 5.3872 | 1.539 |
| 18  | 14a |    | a | 0.006  | 8.2218 | 0.67 | 6.1739 | -     |
| 19  | 14b | 14                                                                                  | b | 0.02   | 7.6990 | 2    | 5.6990 | -     |
| 20  | 15a |    | a | 0.005  | 8.3010 | 0.38 | 6.4202 | -     |
| 21  | 15b | 15                                                                                  | b | 0.033  | 7.4815 | 2.2  | 5.6576 | -     |
| 22  | 17a |    | a | 0.01   | 8.0000 | 0.55 | 6.2596 | -     |
| 23  | 18a |    | a | 0.0006 | 9.2218 | 0.2  | 6.6990 | -     |
| 24  | 19a |   | a | 0.0032 | 8.4949 | 0.3  | 6.5229 | -     |
| 25  | 20a |  | a | 0.0054 | 8.2676 | 0.26 | 6.5850 | -     |
| 26  | 20b | 20                                                                                  | b | 0.2    | 6.6990 | 1.1  | 5.9586 | -     |
| 27* | 21a |  | a | 0.0009 | 9.0458 | 0.78 | 6.1079 | 1.445 |

|            |     |    |   |        |        |        |        |        |   |
|------------|-----|----|---|--------|--------|--------|--------|--------|---|
| <b>28*</b> | 22a |    | a | 0.0008 | 9.0969 | 0.041  | 7.3872 | 1.388  |   |
| <b>29</b>  | 22n | 22 |   |        | 0.0023 | 8.6383 | 3.1    | 5.5086 | - |
| <b>30</b>  | 23a |    | a | 0.011  | 7.9586 | 0.28   | 6.5528 | -      |   |
| <b>31</b>  | 23n | 23 | n | 0.0013 | 8.8861 | 1.8    | 5.7447 | -      |   |
| <b>32</b>  | 24a |    | a | 0.0055 | 8.2596 | 0.28   | 6.5528 | -      |   |
| <b>33</b>  | 24n | 24 | n | 0.0007 | 9.1549 | 0.38   | 6.4202 | -      |   |
| <b>34*</b> | 25a |    | a | 0.004  | 8.3979 | 0.27   | 6.5686 | 1.210  |   |
| <b>35</b>  | 25n | 25 | n | 0.0007 | 9.1549 | 1.6    | 5.7959 | -      |   |
| <b>36</b>  | 15g |    |   | 0.0026 | 8.5850 | 5      | 5.3010 | -      |   |
| <b>37</b>  | 15h | 15 |   | 0.0024 | 8.6198 | 5.6    | 5.2518 | -      |   |
| <b>38</b>  | 15i | 15 |   | 0.0034 | 8.4685 | 8.7    | 5.0605 | -      |   |
| <b>39*</b> | 15k | 15 |   | 0.0043 | 8.3665 | 0.73   | 6.1367 | 1.612  |   |
| <b>40</b>  | 15l | 15 |   | 0.0061 | 8.2147 | 1.6    | 5.7959 | -      |   |

|            |     |    |  |        |        |      |        |       |
|------------|-----|----|--|--------|--------|------|--------|-------|
| <b>41*</b> | 15m | 15 |  | 0.0028 | 8.5528 | 0.81 | 6.0915 | 1.254 |
| <b>42</b>  | 15s | 15 |  | 0.0019 | 8.7212 | 3.3  | 5.4815 | -     |
| <b>43</b>  | 15t | 15 |  | 0.0022 | 8.6576 | 5.2  | 5.2840 | -     |
| <b>44*</b> | 15u | 15 |  | 0.0027 | 8.5686 | 6.3  | 5.2007 | 1.380 |
| <b>45</b>  | 15v | 15 |  | 0.003  | 8.5229 | 6.7  | 5.1739 | -     |
| <b>46</b>  | 15w | 15 |  | 0.0043 | 8.3665 | 8.2  | 5.0862 | -     |

\*Compounds in the test set

**Table S2** Structure and predicted activities of new designed compounds

| No. | R <sub>1</sub> | R <sub>2</sub> | Predicted pIC <sub>50</sub> |        | Distance (APD=2.455) |
|-----|----------------|----------------|-----------------------------|--------|----------------------|
|     |                |                | TgCDPK1                     | Src    |                      |
| D1  |                |                | 9.4164                      | 3.9511 | 0.799                |
| D2  |                |                | 9.3971                      | 3.8977 | 0.867                |
| D3  |                |                | 9.3524                      | 4.1102 | 0.798                |
| D4  |                |                | 9.3514                      | 3.8793 | 1.095                |
| D5  |                |                | 9.3381                      | 4.8057 | 0.781                |
| D6  |                |                | 9.3226                      | 3.8583 | 1.608                |

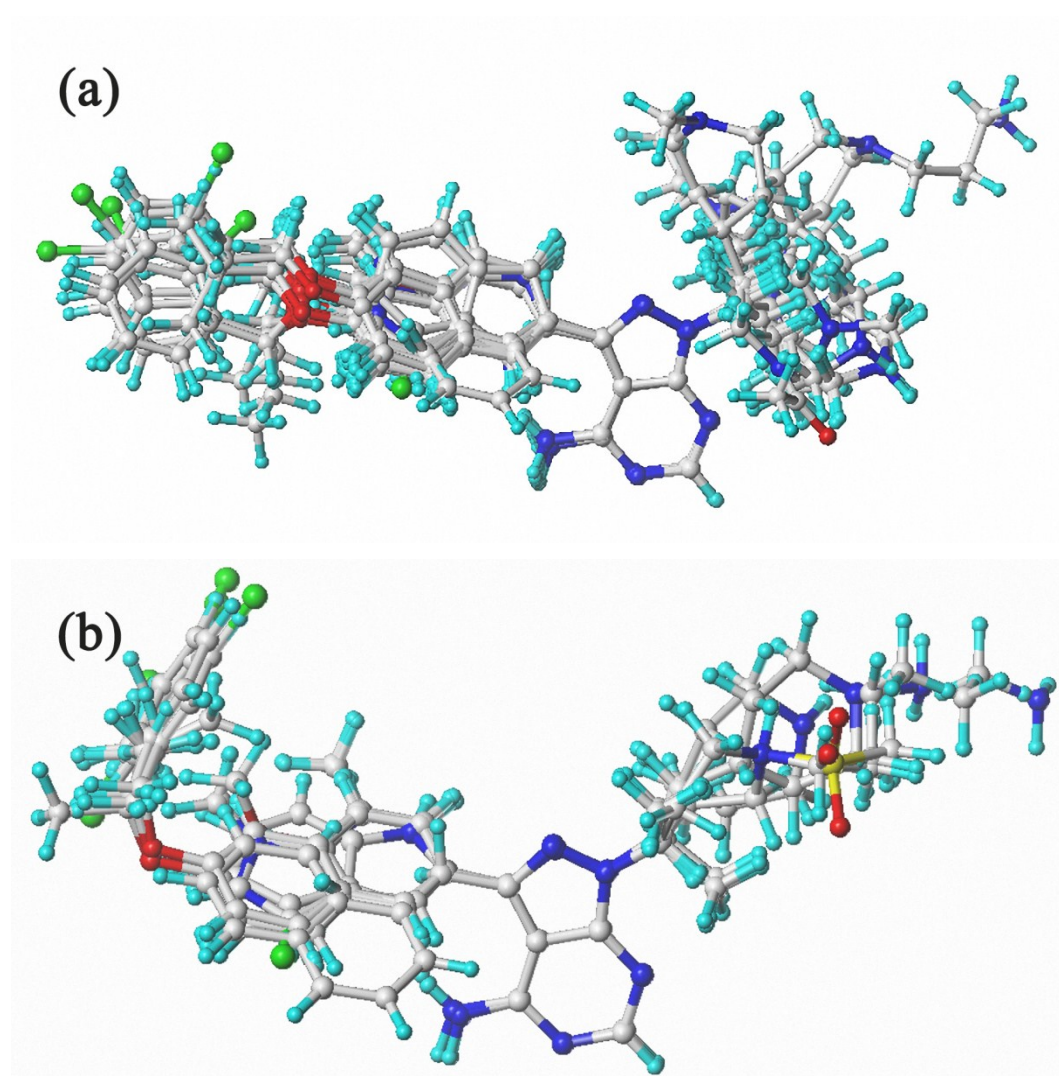

**Fig.S1.** (a) and (b), the alignment of the 34 studied compounds for TgCDPK1 and Src series.



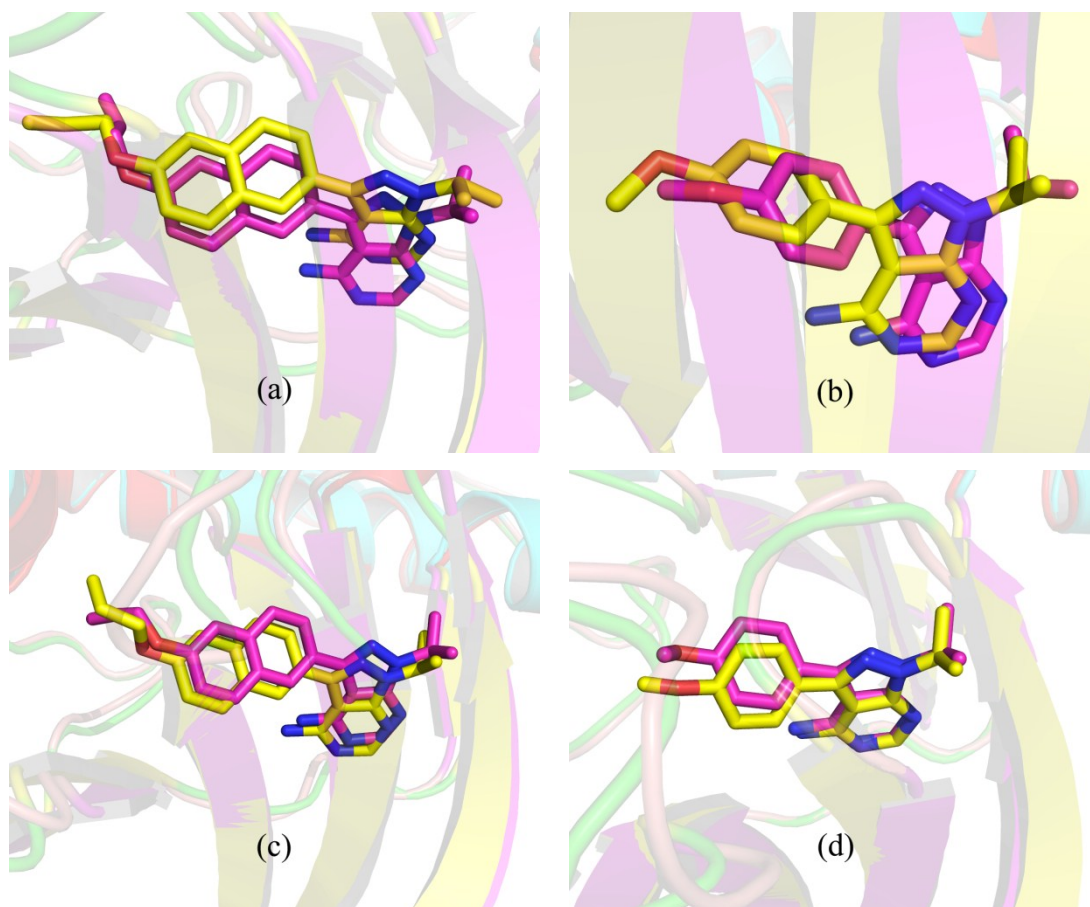

**Fig.S2.** Superimposition of the average structure from the last 2 ns of the MD simulation (magenta) and the initial structure (yellow). (a) 3SXF-23 complex, (b) 3SXF-4 complex, (c) 3UQF-23 complex, (d) 3UQF-4 complex.

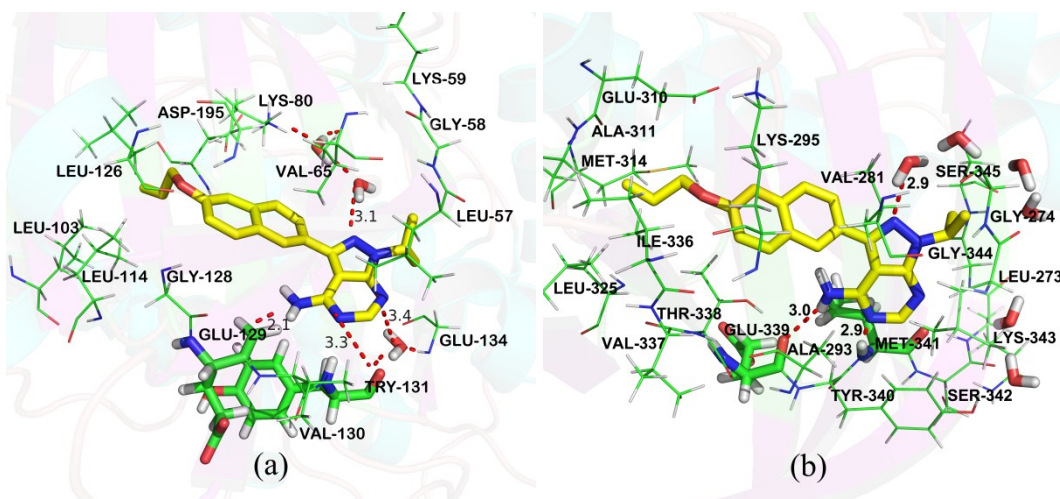

**Fig.S3.** The interaction of inhibitors with water molecules in **23-3SXF**(a) and **23-3UQF**(b) systems.
